# Supplementary material for: Impact of moisture on efficiency-determining electronic processes in perovskite solar cells
Source: Royal Society of Chemistry journal article supplement (doi:10.1039/c7ta02264f), 2017-01-01
Supplement: c7ta02264f1.pdf [file c7ta02264f1.pdf]

# Impact of Moisture on Efficiency-Determining Electronic Processes in Perovskite Solar Cells

## Supporting Information

Manuel Salado<sup>a,b, †</sup>, Lidia Contreras-Bernal<sup>a, †</sup>, Laura Calì<sup>b</sup>, Anna Todinova<sup>a</sup>, Carmen López-Santos<sup>c</sup>, Shahzada Ahmad<sup>b</sup>, Ana Borrás<sup>c</sup>, Jesús Idígoras<sup>a,\*</sup>, Juan A. Anta<sup>a,\*</sup>.

<sup>a</sup> Área de Química Física, Universidad Pablo de Olavide, E-41013, Sevilla, Spain.

<sup>b</sup> Abengoa Research, C/Energía Solar nº 1, Campus Palmas Altas, 41014 Sevilla, Spain

<sup>c</sup> Nanotechnology on Surfaces Laboratory, Instituto de Ciencia de Materiales de Sevilla (CSIC-Univ. Sevilla), Seville ES-41092, Spain

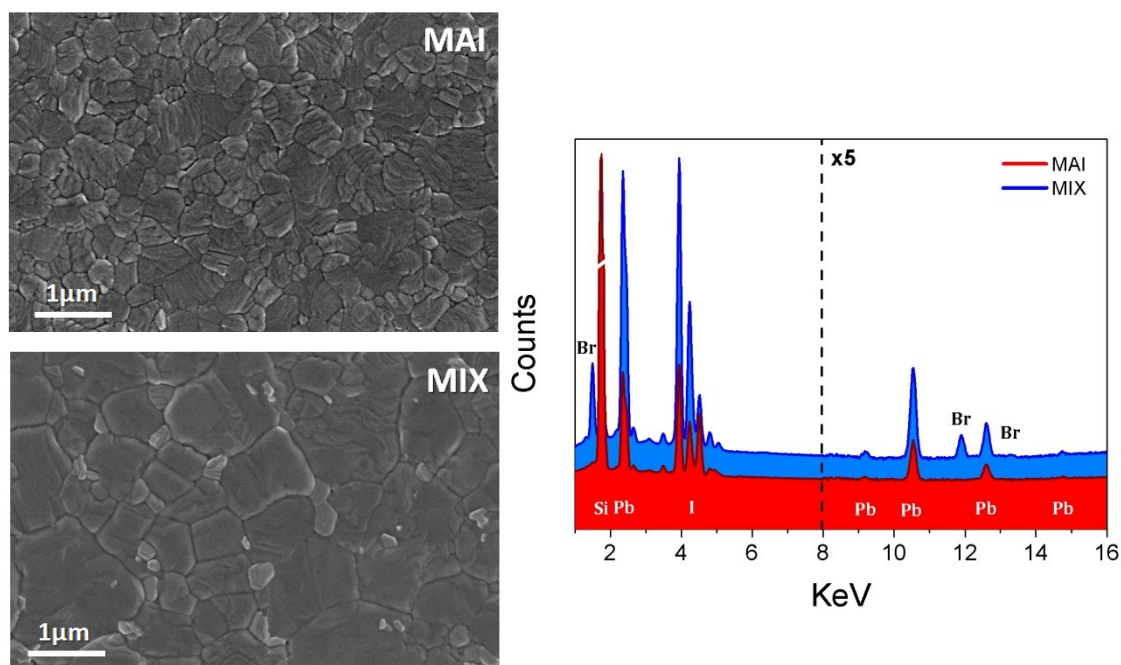

**Figure S1.** (Left) Plane-view scanning electron microscopy (SEM) images for the (MAI)  $\text{MAPbI}_3$  and (MIX)  $\text{Cs}_{0.05}(\text{MAPbBr}_3)_{0.15}(\text{FAPbI}_3)_{0.85}$  perovskite layers. (Right) EDX spectra of the different perovskite layers deposited on  $\text{Si}/\text{cTiO}_2/\text{mTiO}_2$ .

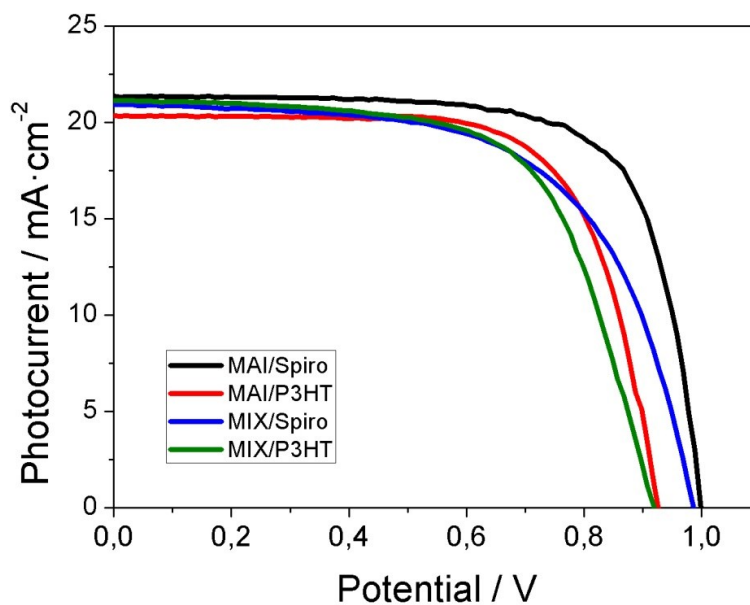

**Figure S2.** Current-voltage characteristics of the different devices under 1 sun - AM1.5 illumination in reverse scan. A scan rate of 100mV/s with a poling of 30s at 1.2V was employed.

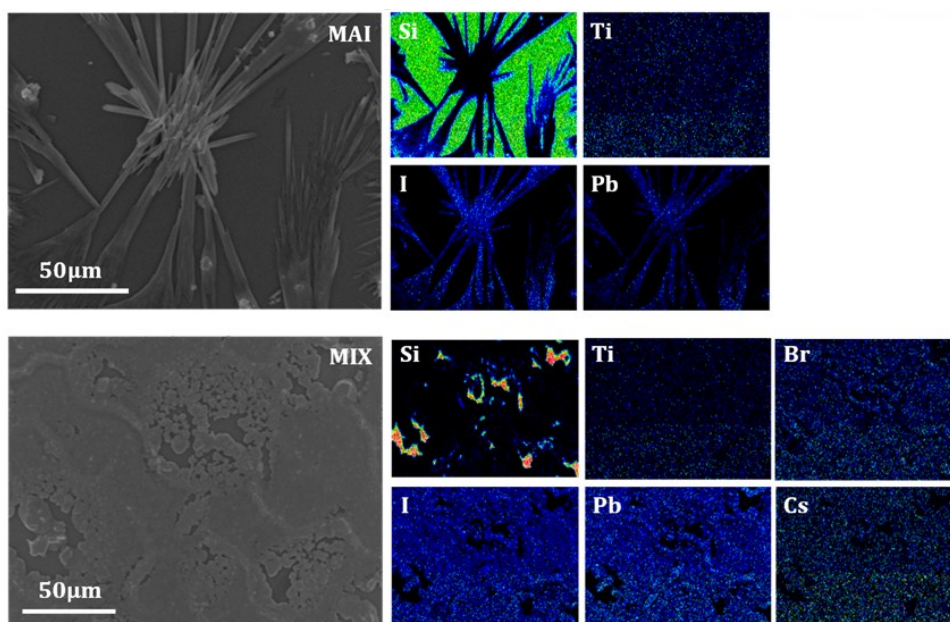

**Figure S3.** EDX mapping of the different (MAI and MIX) perovskite layers deposited on Si/*c*TiO<sub>2</sub>/*m*TiO<sub>2</sub> after moisture exposure (RH > 90%) for 5 hour at room temperature.

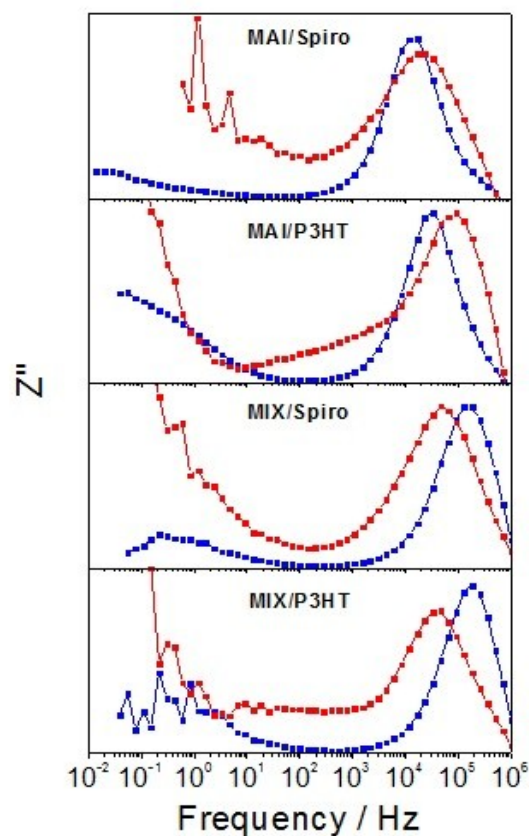

**Figure S4.** Impedance frequency plots of the imaginary part for (blue) fresh and (red) degraded PSCs obtained at open-circuit condition and under white illumination.

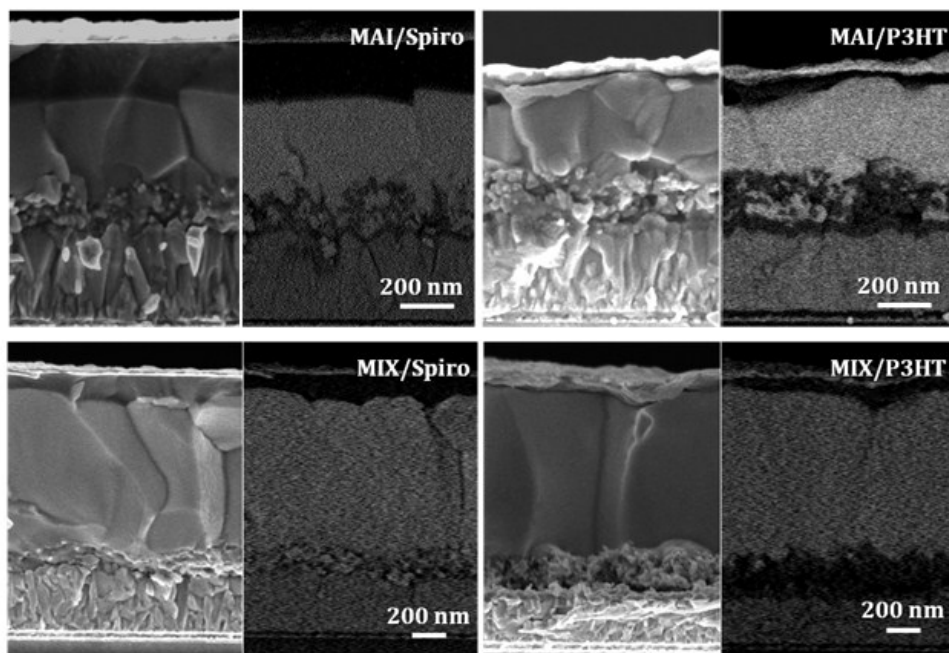

**Figure S5.** (Right) cross-section scanning electron microscopy and (left) back scattering electron images for the different configurations. A thickness of 450 nm and 950 nm were found for MAI and MIX devices, respectively.

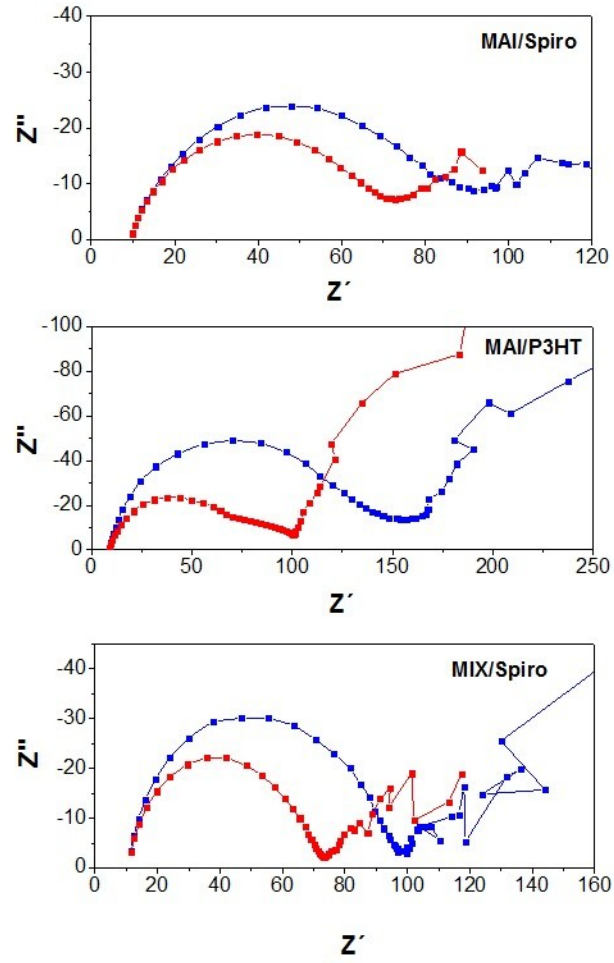

**Figure S6.** Nyquist impedance spectra for degraded MAI/Spiro, MAI/P3HT and MIX/Spiro devices at open-circuit condition and under blue and red illumination.

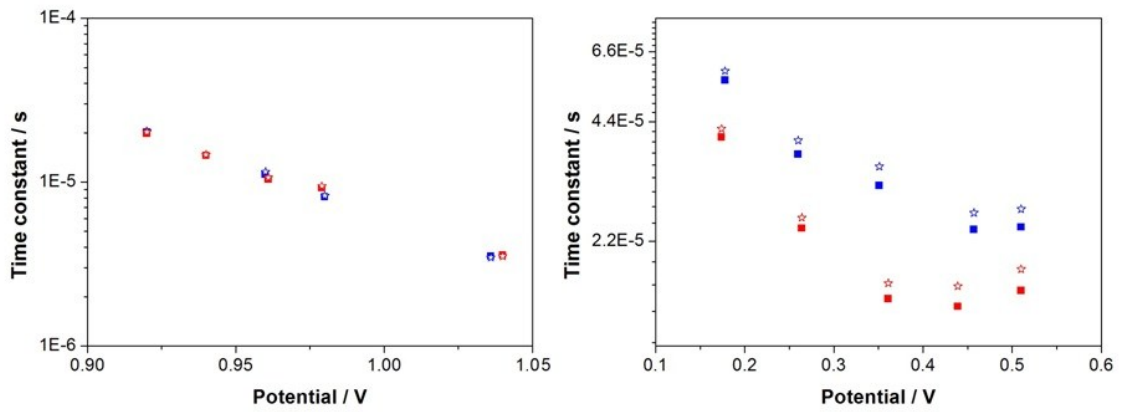

**Figure S7.** HF time constant extracted as (squares)  $R_{rec}-C_b$  and (stars)  $1/2\pi f$  from impedance response for (right) fresh and (left) degraded MAI/Spiro devices at open-circuit condition and under blue and red illumination.

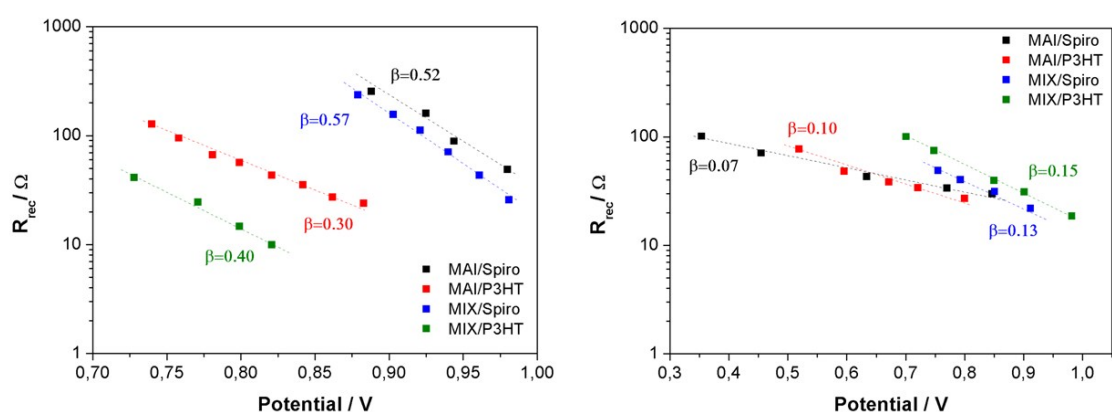

**Figure S8.** Electron recombination resistance versus open-circuit potential and under white-light excitation extracted from fittings of the impedance spectra for the (left) fresh and (right) degraded PSCs

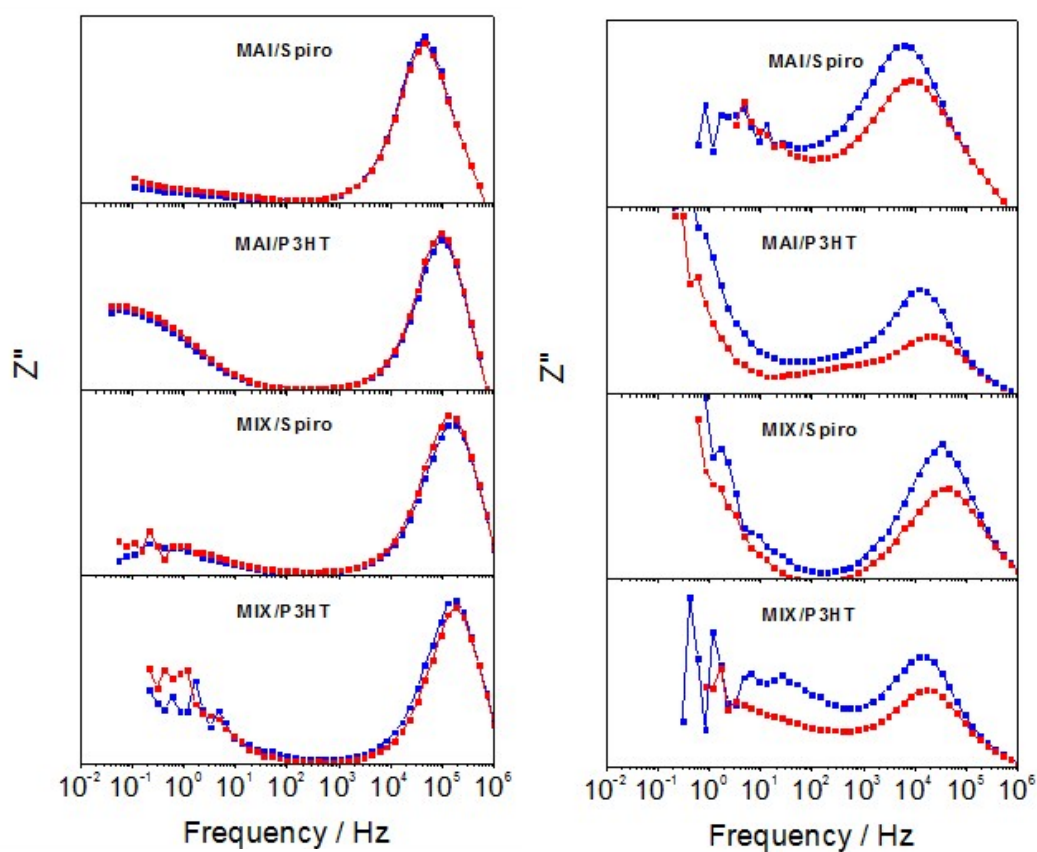

**Figure S9.** Impedance frequency plots of the imaginary part for (left) fresh and (right) degraded PSCs obtained at open-circuit condition and under illumination using the two excitation wavelengths of  $\lambda_{blue} = 465$  nm (blue) and  $\lambda_{red} = 635$  nm (red).



**Table S1.** Photovoltaic parameters measured under 1 sun - AM 1.5 illumination for the different devices in reverse scan. Error bars are estimated from the results of three best devices of the same configuration.

|           | $J_{sc}$ (mA·cm <sup>-2</sup> ) | $V_{oc}$ (mV) | Fill Factor (%) | Efficiency (%) |
|-----------|---------------------------------|---------------|-----------------|----------------|
| MAI/Spiro | 20.9 ± 0.2                      | 996 ± 5       | 73 ± 2          | 15.3 ± 0.9     |
| MAI/P3HT  | 20.4 ± 0.3                      | 940 ± 10      | 70 ± 5          | 13.2 ± 0.8     |
| MIX/Spiro | 21.2 ± 0.1                      | 986 ± 4       | 64 ± 3          | 13 ± 1         |
| MIX/P3HT  | 21.1 ± 0.2                      | 912 ± 17      | 65 ± 1          | 12.5 ± 0.2     |

**Table S2.** Static water contact angle of the different devices.

|           | Water Contact Angle |
|-----------|---------------------|
| MAI       | 72.5 ± 2            |
| MAI/Spiro | 77 ± 2              |
| MAI/P3HT  | 106 ± 3             |
| MIX       | 87 ± 2              |
| MIX/Spiro | 78 ± 2              |
| MIX/P3HT  | 105 ± 3             |

**Table S3.** Atomic percentage of the elements present in the samples estimated after XPS characterization.

| Device             | At % | Pb   | I    | O    | C    | N    | S    | F   | Ti   |
|--------------------|------|------|------|------|------|------|------|-----|------|
| MAI                |      | 15.9 | 18.6 | 11.2 | 47.0 | 7.3  | -    | -   | -    |
| MAI (90% RH)       |      | 7.7  | 14.8 | 32.8 | 27.4 | 3.4  | -    | -   | 13.9 |
| MAI/Spiro          |      | -    | -    | 14.1 | 73.2 | 4.5  | 2.4  | 5.8 | -    |
| MAI/Spiro (90% RH) |      | 0.2  | 0.7  | 15.1 | 68.2 | 5.6  | 2.2  | 8.1 | -    |
| MAI/P3HT           |      | -    | -    | -    | 88.8 | -    | 11.2 | -   | -    |
| MAI/P3HT (90% RH)  |      | -    | 0.4  | 2.1  | 87.7 | -    | 9.8  | -   | -    |
| MIX                |      | 13.4 | 22.8 | 10.8 | 44.9 | 8.1  | -    | -   | -    |
| MIX (90% RH)       |      | 14.4 | 37.9 | 8.6  | 28.9 | 10.2 | -    | -   | -    |
| MIX/Spiro          |      | -    | -    | 12.7 | 77.2 | 4.4  | 2.0  | 3.6 | -    |
| MIX/Spiro (90% RH) |      | -    | 0.6  | 19.1 | 68.1 | 4.6  | 1.7  | 5.9 | -    |
| MIX/P3HT           |      | -    | -    | -    | 89.6 | -    | 10.4 | -   | -    |
| MIX/P3HT (90% RH)  |      | -    | -    | -    | 90.7 | -    | 9.3  | -   | -    |
